# Supplementary material
Source: publisher site journal article supplement (https://www.dovepress.com/article/290002)
Supplement: Supplementary file 1 [file get_supplementary_file.php]

Figure S1

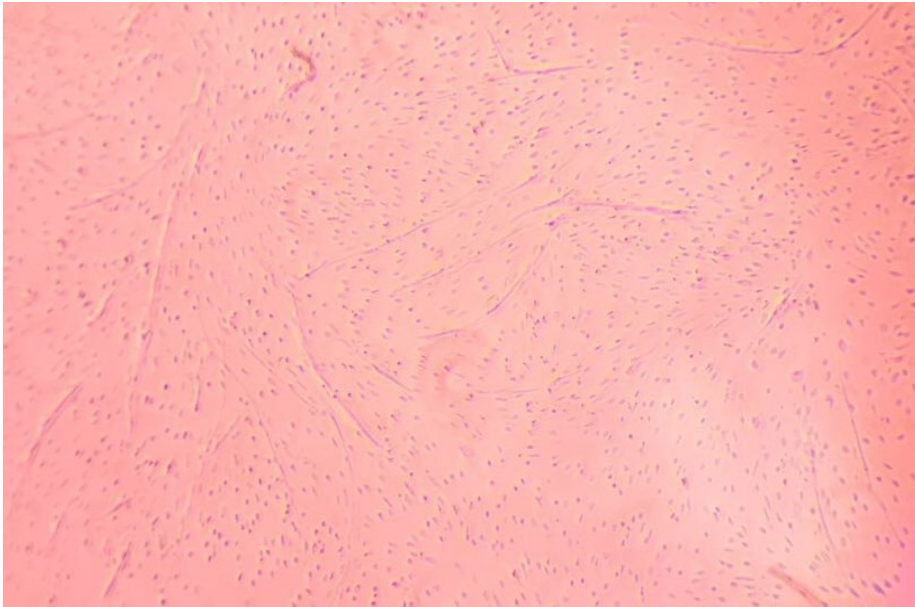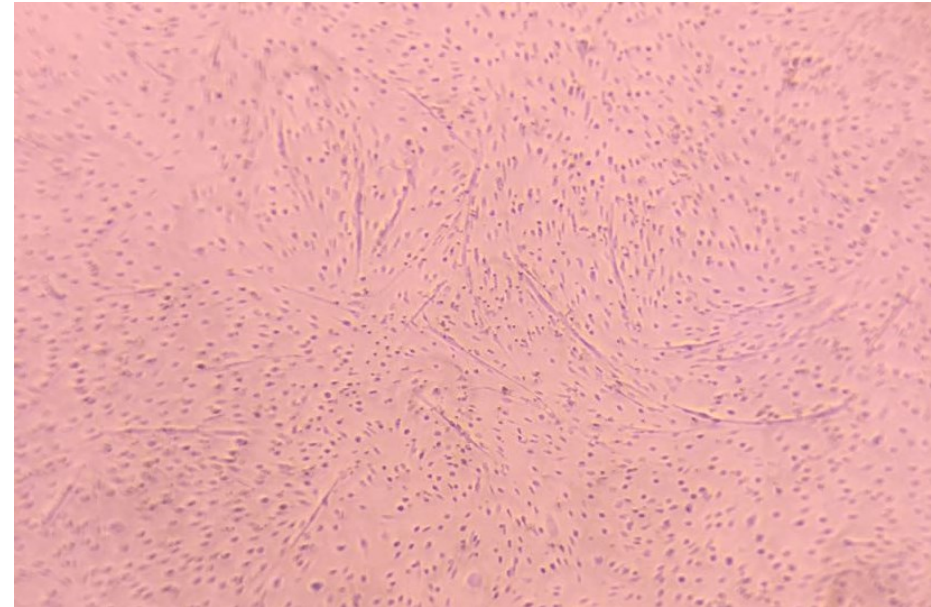

Figure S2

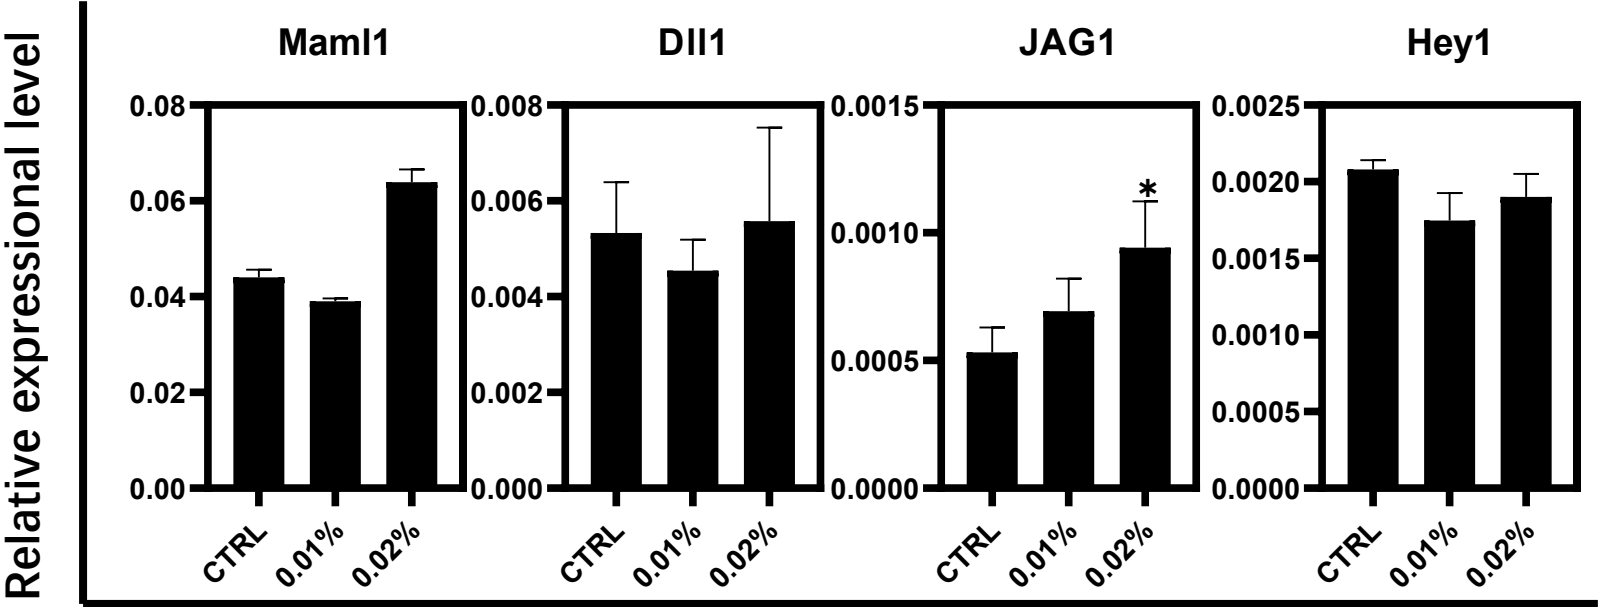

Figure S3

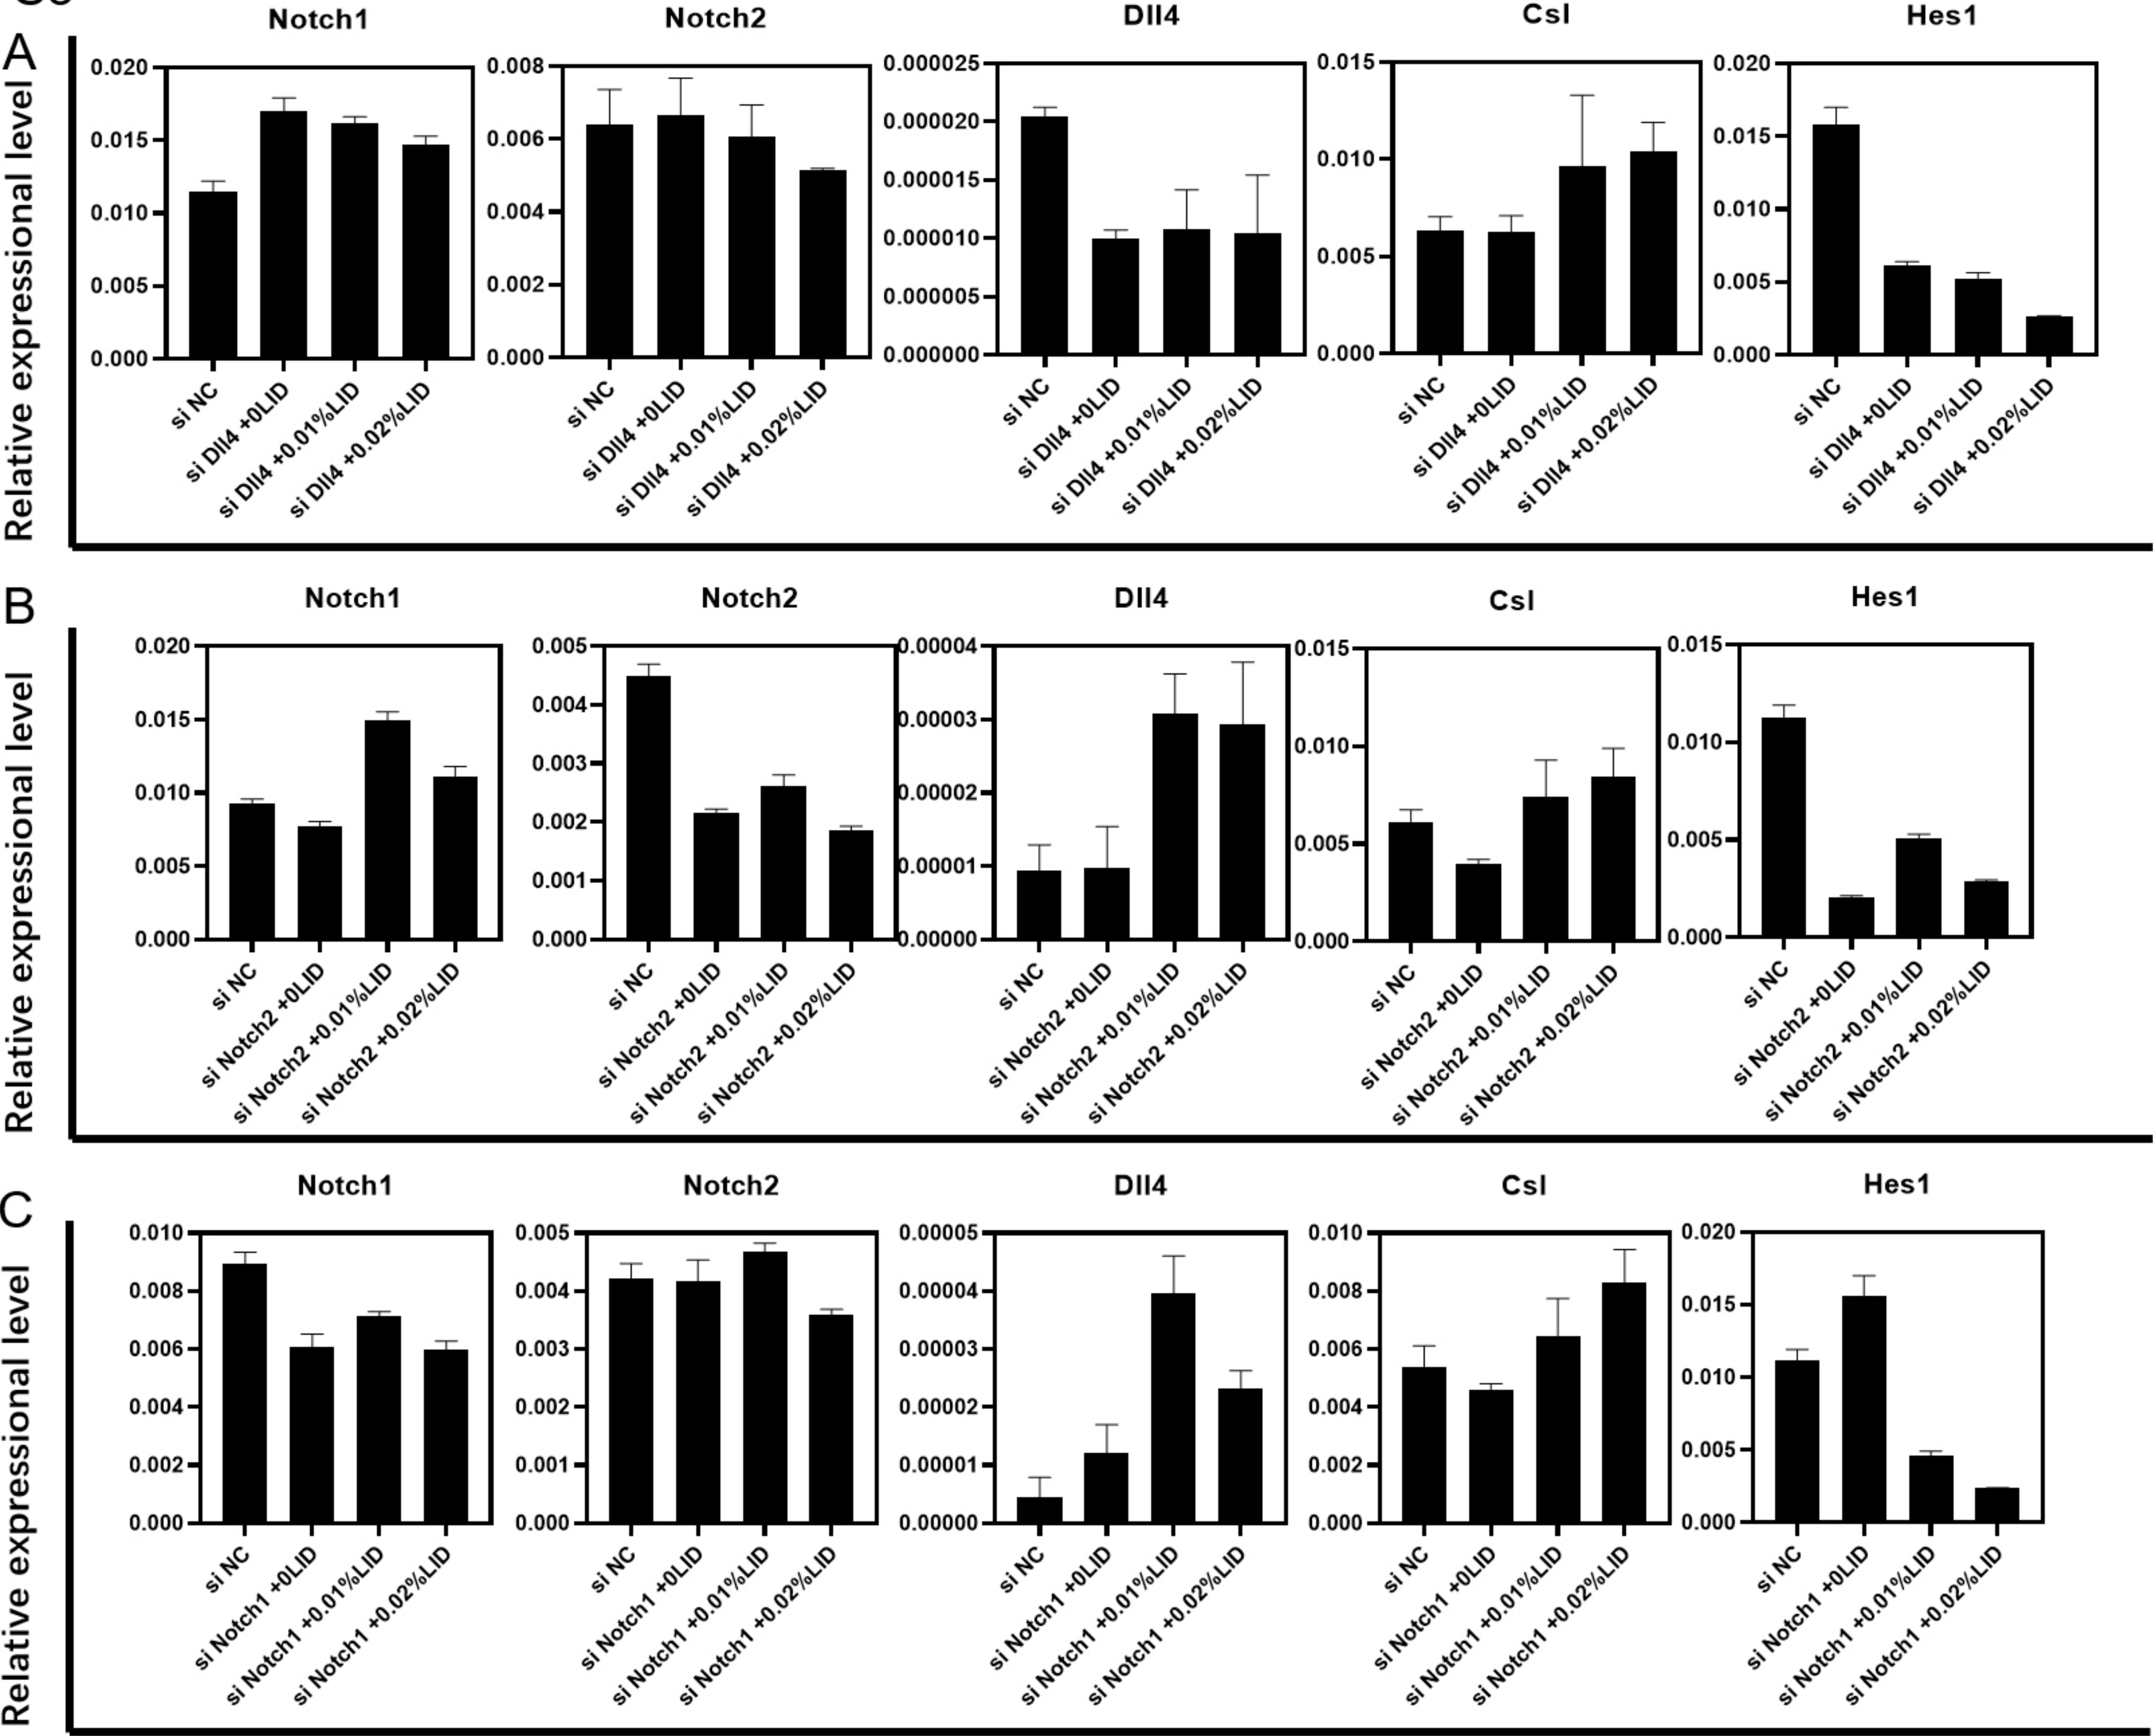

Figure S4

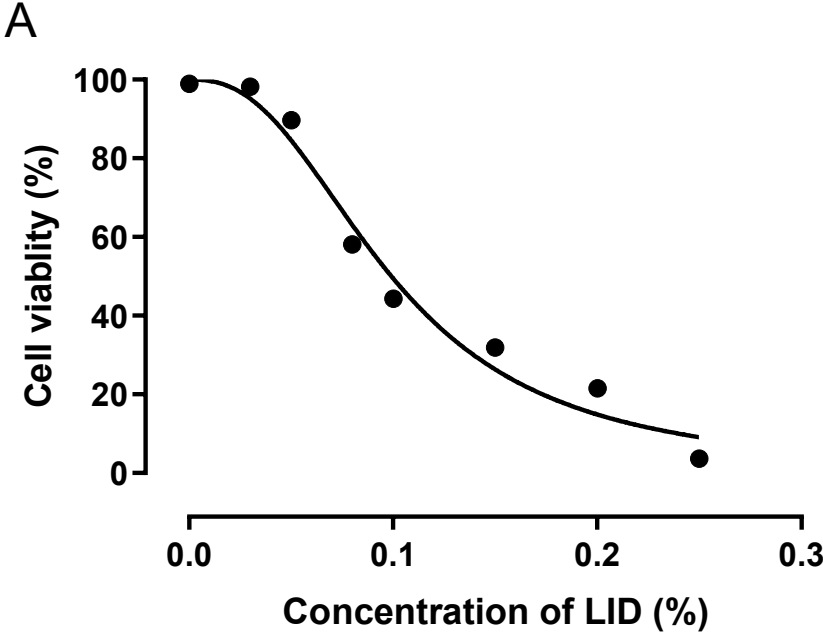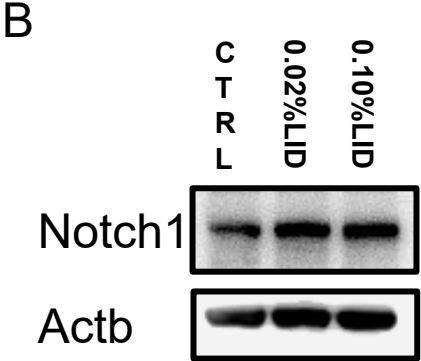

Figure S5

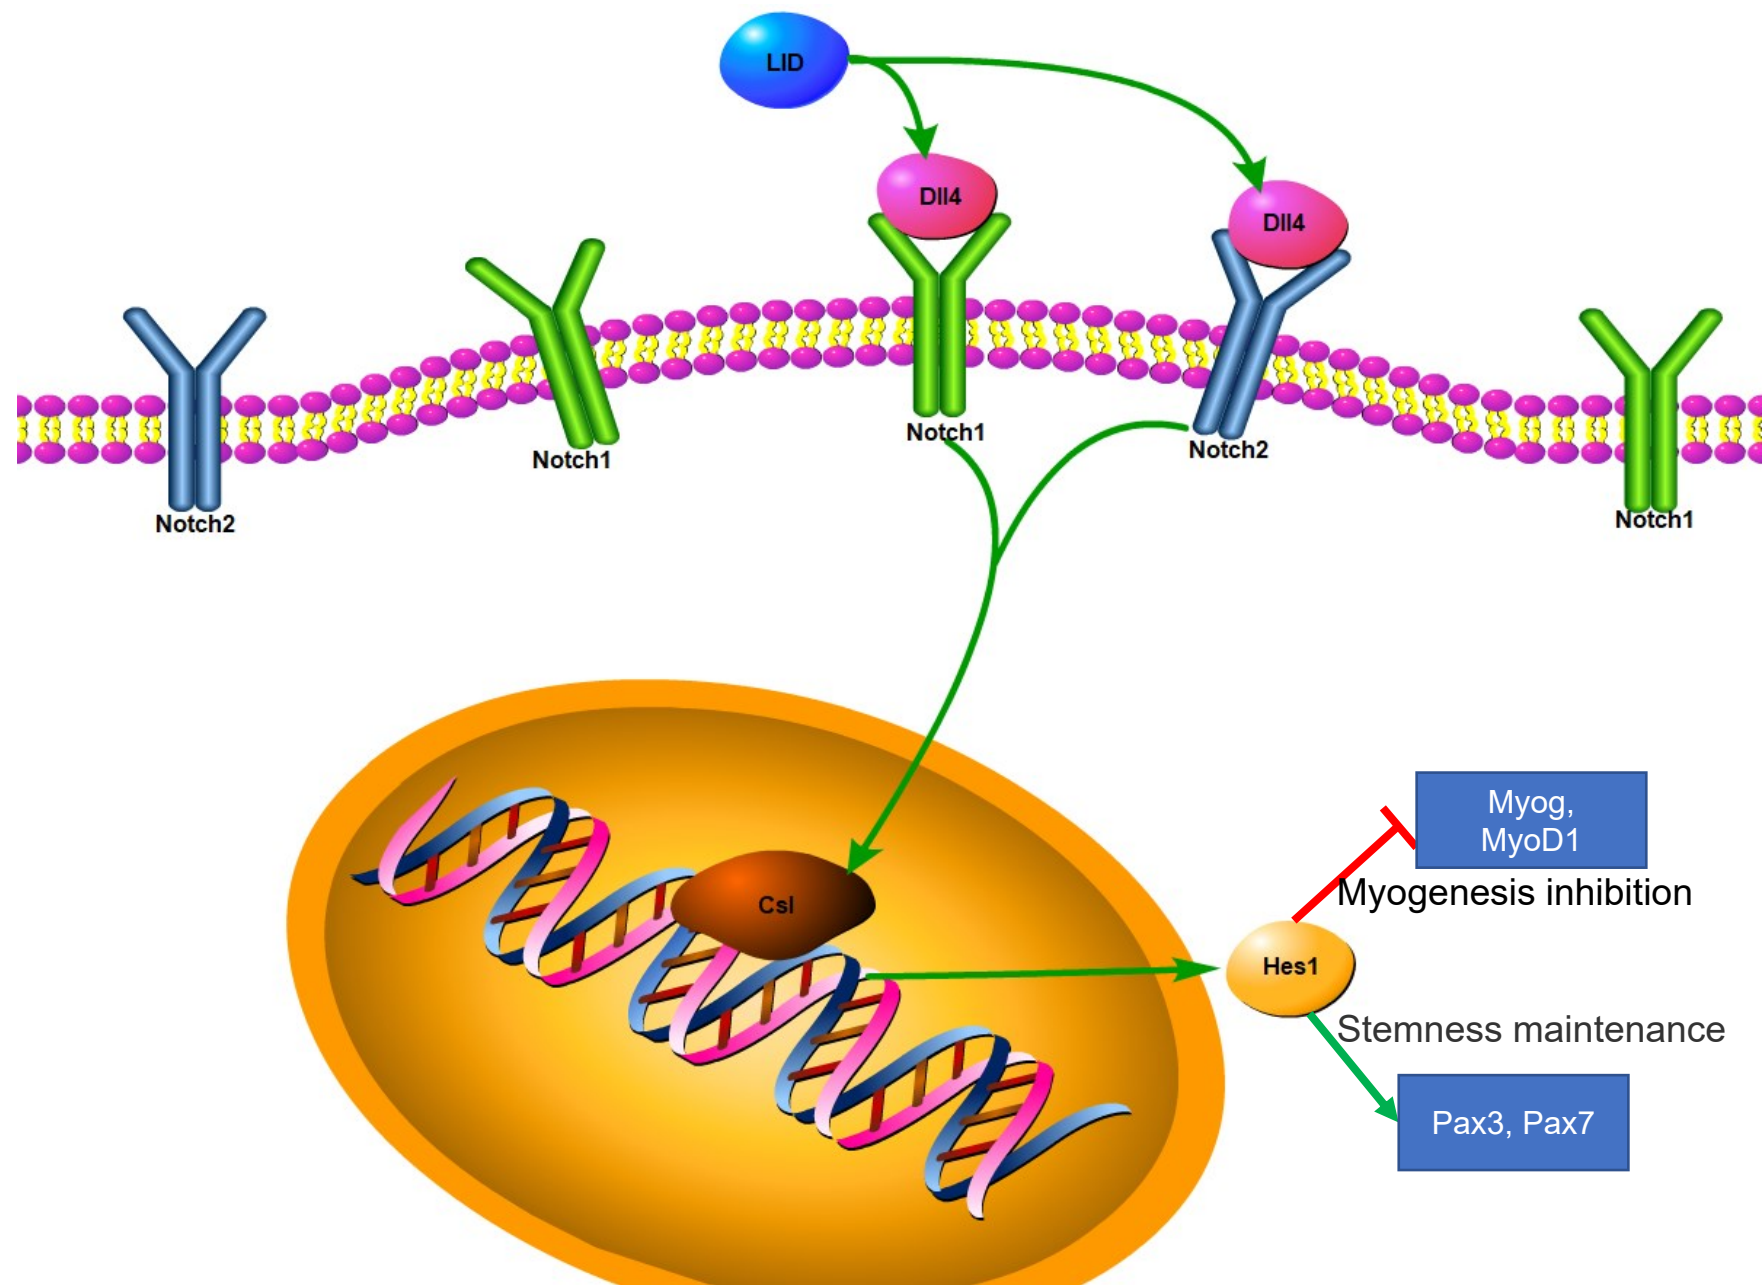

## Supplemental Figure Legends

**Figure S1.** Primary culture EOM myoblasts were induced in differential medium. Pictures were taken in the third and fourth days. The myoblasts formed mature myotubes.

**Figure S2.** Some genes in the Notch signal pathway didn't show significant change after treating by lidocaine. qRT-PCR was used to measure the transcript levels of gene: Mmal1, Hey1, Dll1, Jag1. (#P>0.05, \*P<0.05, \*\*P<0.01, \*\*\*P<0.001, n=3, bars represent SD).

**Figure S3.** (A, B, C) Dll4, Notch2 and Notch1 were silenced respectively with siRNA. qRT-PCR was used to measure the transcript levels of gene: Notch1, Notch2, Dll4, Csl, Hes1.

**Figure S4.** (A) Apoptotic effects of lidocaine. (B) Protein level of Notch1 was analyzed by western blot.

**Figure S5.** Schematic diagram to show the involvement of Notch pathway signal. The green arrows mean activating while red arrow means inhibition.
